# Supplementary material
Source: PubMed Central journal article supplement (PMC4463197)
Supplement: JCI78124sd.pdf [file JCI78124sd.pdf]

## Supplemental Material

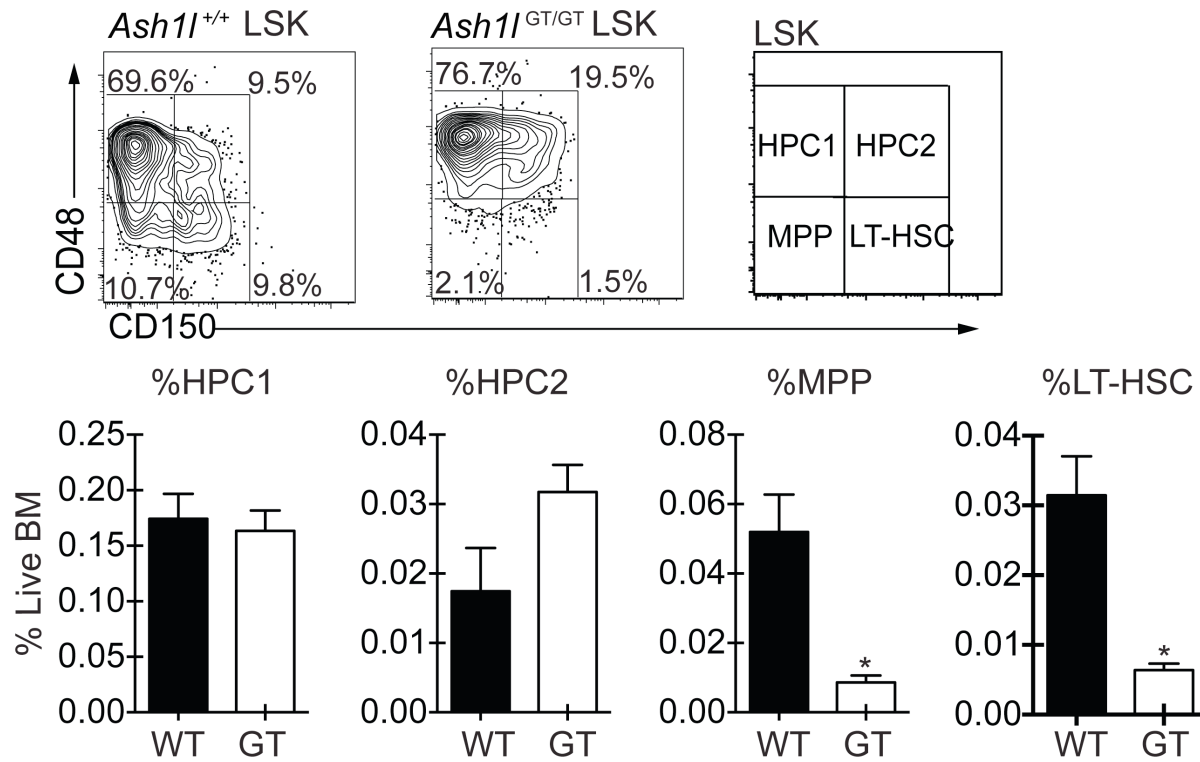

**Figure S1. Bone marrow HPC1/2 hematopoietic progenitors are maintained in adult *Ash1l*-deficient mice, while both multipotent progenitors and long-term HSCs become depleted.**

Reduced numbers of LSK CD150<sup>+</sup>CD48<sup>-</sup> long-term hematopoietic stem cells (LT-HSC) and CD150<sup>-</sup>CD48<sup>-</sup> multipotent progenitors (MPP), but not CD150<sup>-</sup>CD48<sup>+</sup> (HPC1) and CD150<sup>+</sup>CD48<sup>+</sup> hematopoietic progenitor cells (HPC2) in adult GT mice (n=3-5/genotype, mean +/- SEM, \*p<0.05).

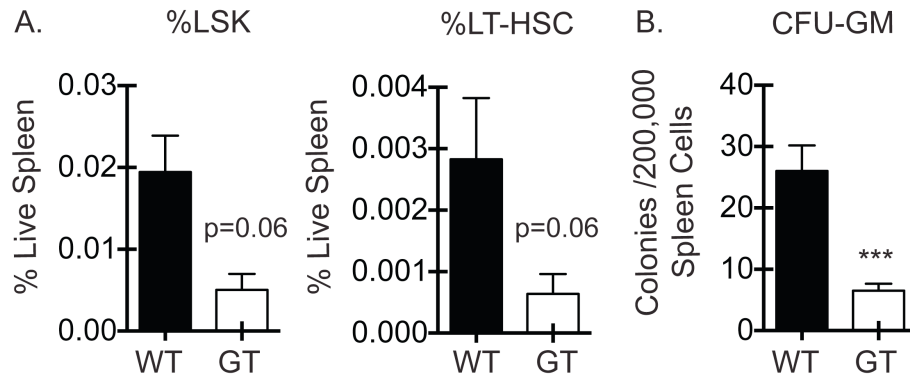

**Figure S2. Frequency of hematopoietic stem and progenitor cells and colony formation are reduced in the *Ash1l*-deficient spleen.**

**(A)** Flow cytometric analysis of splenic LSK and LT-HSCs in wild-type (WT) and *Ash1l*<sup>GT/GT</sup> (GT) in adult (13-21 weeks) mice (n=4/genotype; mean +/- SEM); **(B)** Myeloid colony formation by GT spleen in CFU-GM assays (n=4/genotype; mean +/- SEM).

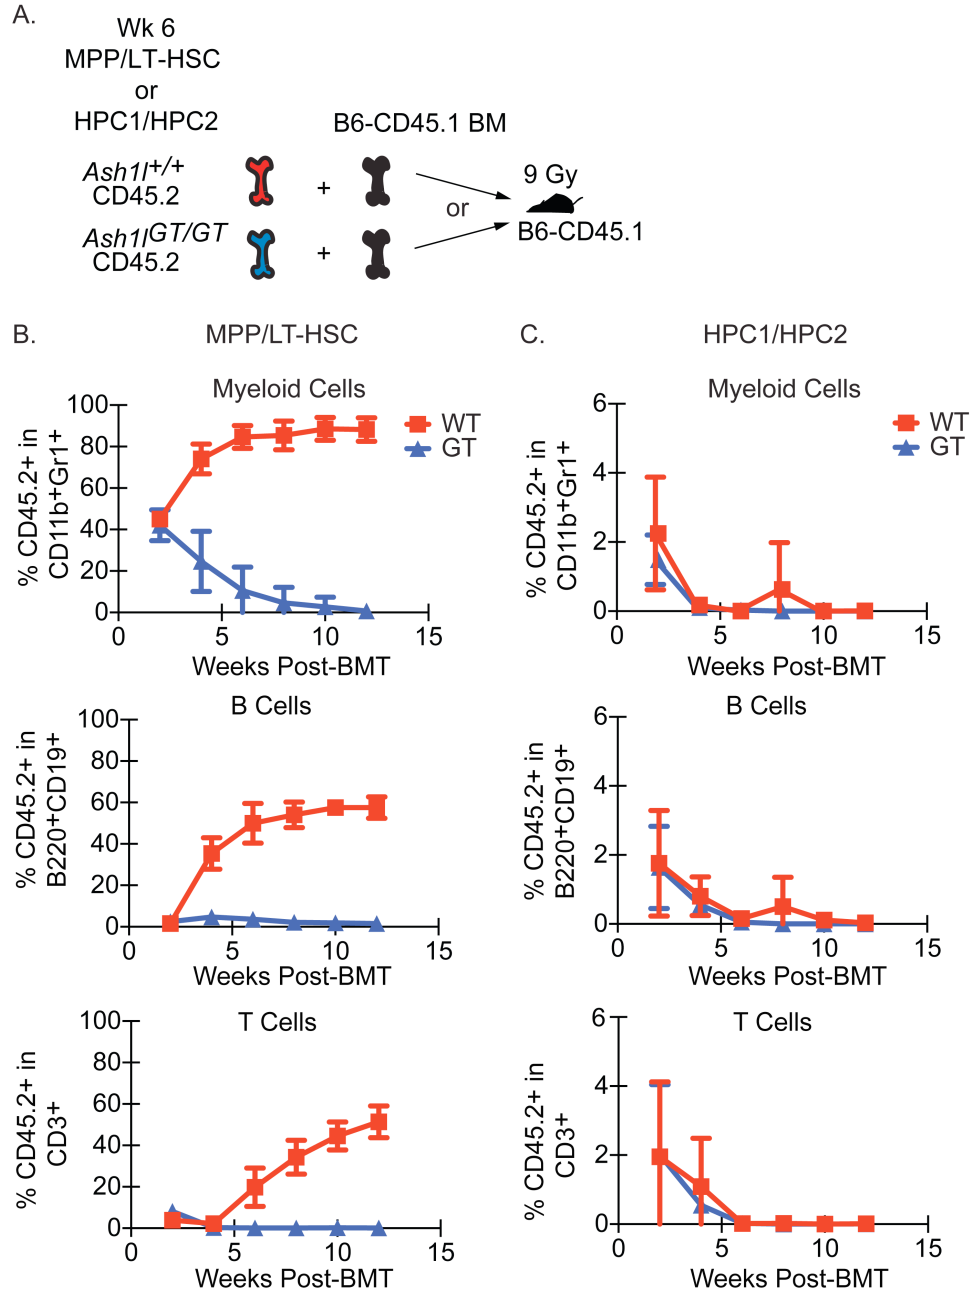

**Figure S3. *Ash1l*-deficient CD48<sup>+</sup>LSK progenitors provide transient hematopoietic output at two weeks, but do not sustain long-term reconstitution.**

(A) Experimental strategy: 500 sort-purified *Ash1l*<sup>+/+</sup> or *Ash1l*<sup>GT/GT</sup> B6-CD45.2 CD48<sup>+</sup>LSK cells (containing LT-HSCs and multipotent progenitors) or 500 CD48<sup>+</sup>LSK cells (containing HPC1/2 progenitors) were transplanted into irradiated (9 Gy) B6-CD45.1 recipients, together with  $2 \times 10^5$  B6-CD45.1 BM competitor cells (5 mice/group); (B) *Ash1l*-deficient CD48<sup>+</sup>LSK progenitors (LT-HSC/MPP) provided transient reconstitution of myeloid cells at 2 weeks, but failed to sustain long-term hematopoiesis; (C) *Ash1l*<sup>+/+</sup> and *Ash1l*<sup>GT/GT</sup> HPC1/HPC2 cells provided only minimal transient contribution to hematopoietic output as assessed in the peripheral blood.

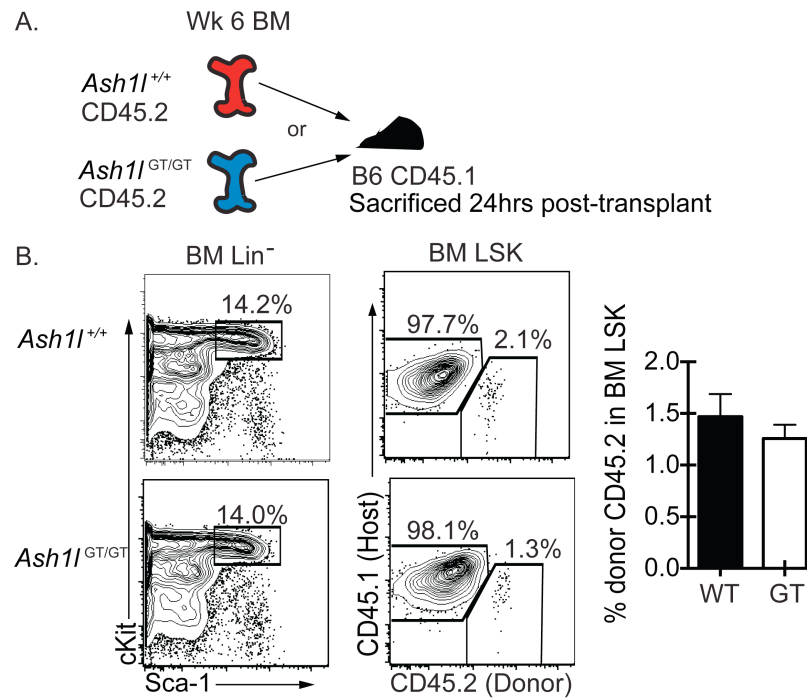

**Figure S4. *Ash1l*-deficient HSCs can home to the bone marrow.**

(A) Experimental strategy: *Ash1l*<sup>+/+</sup> or *Ash1l*<sup>GT/GT</sup> B6-CD45.2 BM cells ( $25 \times 10^6$ ) were injected into B6-CD45.1 recipients; (B) Percentage of CD45.2<sup>+</sup> donor-derived cells among BM LSK progenitors 24 hours after transplantation (n=4/genotype). Bar graph shows data corrected by the % LSK cells in donor BM (mean  $\pm$  SEM).

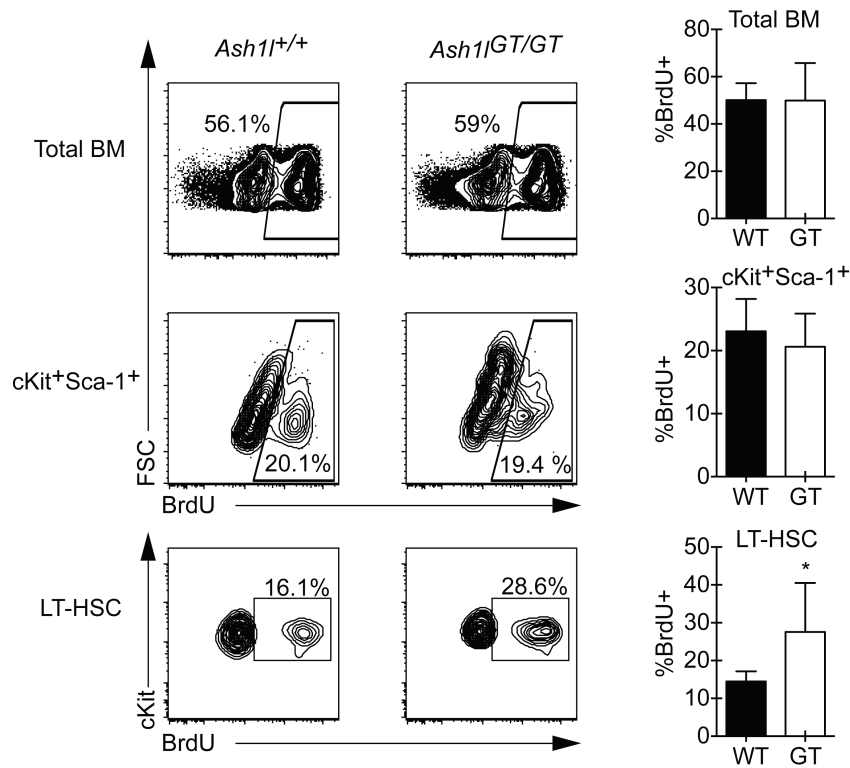

**Figure S5. Increased BrdU incorporation in phenotypically defined *Ash1*-deficient bone marrow LT-HSCs.**

Flow cytometric analysis of BrdU incorporation in P19 total BM, c-Kit<sup>+</sup>Sca-1<sup>+</sup> cells and LT-HSCs (CD150<sup>+</sup>CD48<sup>-</sup>LSK) (BrdU 0.5 mg i.p. 12 hours before analysis). There was no significant difference between WT and GT in total BM and c-Kit<sup>+</sup>Sca-1<sup>+</sup> cells, but increased uptake in GT LT-HSCs (n≥4/genotype from 3 independent experiments; mean +/- 2SEM).

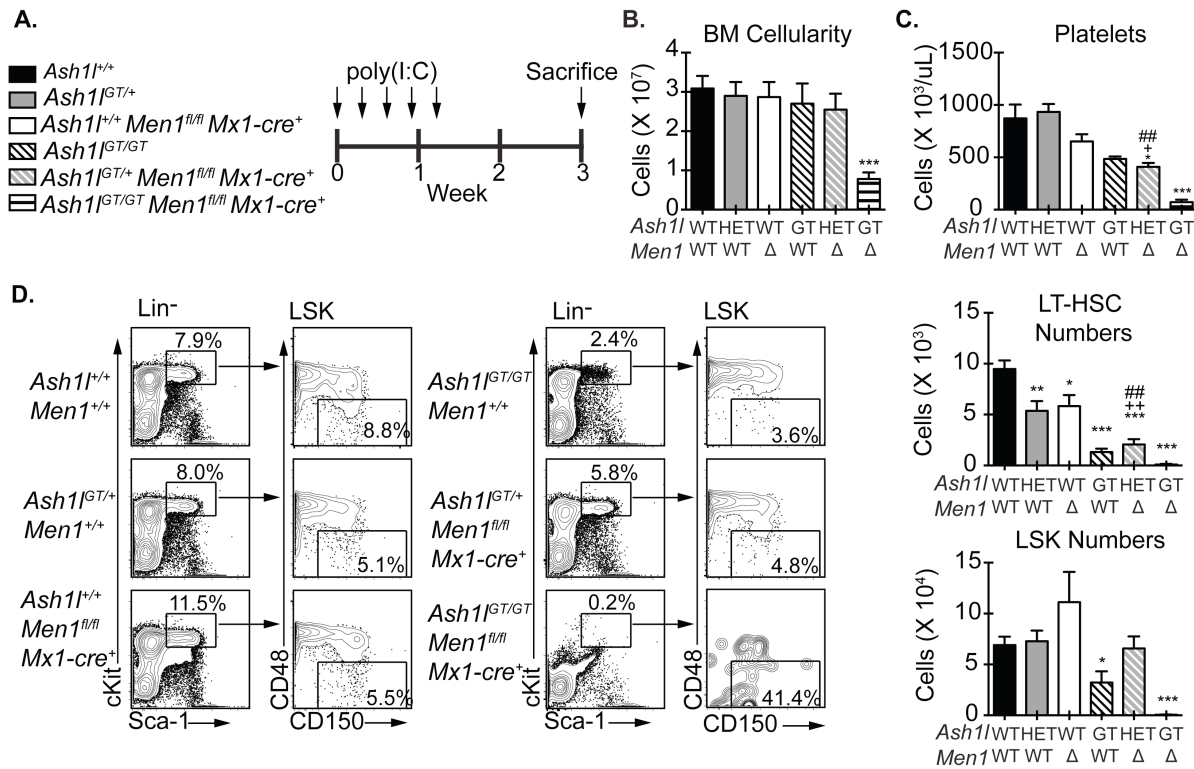

**Figure S6. Combined *Ash1l* and *Men1* deficiency induces overt hematopoietic failure and profound depletion of LT-HSCs and LSK progenitors.** (A) Experimental strategy: mice of indicated genotypes were injected with poly(I:C) (20  $\mu$ g every 2 days x5); (B) BM cellularity 3 weeks after initiation of poly(I:C) ( $\geq 5$  mice/genotype; mean  $\pm$  SEM); (C) Platelet count 3 weeks after initiation of poly(I:C); (D) Representative flow cytometry plots (left) and bar graphs (right) quantifying BM LT-HSC and LSK progenitors. LT-HSC and LSK frequencies and absolute cell numbers reflected a profound defect in  $Ash1l^{GT/GT} Men1^{fl/fl} Mx1-Cre^+$  mice and reduced LT-HSC numbers in  $Ash1l^{GT/+} Men1^{fl/fl} Mx1-cre^+$  mice ( $\geq 5$  mice/genotype; mean  $\pm$  SEM). \* $p < 0.05$ , \*\* $p < 0.01$ , \*\*\* $p < 0.001$  compared to wild-type. For comparisons between  $Ash1l^{GT/+} Men1^{fl/fl} Mx1-Cre^+$  and  $Ash1l^{GT/+}$  or  $Men1^{fl/fl} Mx1-Cre^+$ : ##  $p < 0.01$  compared to  $Ash1l^{GT/+}$ ; ++  $p < 0.01$  compared to  $Men1^{fl/fl} Mx1-Cre^+$ .
